# Supplementary material for: Expectation focused and frequency enhanced cognitive behavioural therapy for patients with major depression (EFFECT): a study protocol of a randomised active-control trial
Source: PubMed Central journal article supplement — BMJ Open. 2023 Mar 21;13(3):e065946. doi: 10.1136/bmjopen-2022-065946 (PMC10040046; doi:10.1136/bmjopen-2022-065946), 2023-03-21
Supplement: bmjopen-2022-065946supp001.pdf [file bmjopen-2022-065946supp001.pdf]

## Appendix

### A 1.

Study information and informed consent (Original in German)

## „Expectation Focused and Frequency Enhanced Cognitive-behavioral Therapy (EFFECT)“

### Informationsschreiben für Studienteilnehmerinnen und Studienteilnehmer

Liebe Studieninteressierte, Lieber Studieninteressierter,

wir freuen uns über Ihr Interesse an unserem Forschungsprojekt EFFECT, in dem wir einerseits kognitiv-verhaltenstherapeutische Behandlungen mit einmal wöchentlichen und zweimal wöchentlichen Therapiesitzungen vergleichen wollen und andererseits die Wirksamkeit von zwei kognitiv-verhaltenstherapeutischen Behandlungsmethoden vergleichen.

Das Therapieangebot ist Mittelpunkt eines Forschungsprojekts (Leitung: Prof. Dr. Winfried Rief, Professur für klinische Psychologie und Psychotherapie, Philipps-Universität Marburg).

### Worum geht es in dieser Studie?

Wir wissen aus verschiedenen Studien, dass Psychotherapie bei psychischen Erkrankungen wie Depressionen wirksam ist und zu einer Reduktion der depressiven Symptome führt. Wir wissen aber auch, dass es viele Faktoren gibt, die einen Einfluss auf den Erfolg der Behandlung haben können. Dazu gehört einerseits die Anzahl der Therapie-Sitzungen pro Woche. In dieser Studie wollen wir untersuchen, ob die Anzahl der Therapie-Sitzungen pro Woche (1 vs. 2) die Wirksamkeit der kognitiven Verhaltenstherapie zur Behandlung von Depressionen verbessern kann.

Weiterhin wissen wir aus der Forschung, dass Erwartungen unser Verhalten und unser Befinden beeinflussen können und sogar einen Einfluss auf den Therapie-Erfolg haben können. Deswegen geht es in dieser Studie auch darum neue und innovative erwartungsfokussierte Therapietechniken im Rahmen einer kognitiven Verhaltenstherapie zu untersuchen.

### Was ist kognitive Verhaltenstherapie (KVT) genau?

Die kognitive Verhaltenstherapie ist eine Form der Psychotherapie, welche sich vorrangig auf das Hier und Jetzt bezieht. Weiter geht die KVT davon aus, dass das Verhalten, die Gedanken und die Gefühle eng zusammenhängen, wobei die aktive Veränderung des Verhaltens und den Gedanken, die Gefühle dauerhaft verändern kann. Das Verhalten das ein Mensch zeigt, ist meist ein Ergebnis von bewussten und nichtbewussten Lernprozessen. Im Rahmen der Psychotherapie wird das Verhalten gemeinsam analysiert, um es später bewusst zu ändern. Kognitionen beziehen sich auf unser Denken. Dabei wird geschaut, welche Gedanken zur psychischen Störung beitragen, um diese mit verschiedenen Techniken zu ändern oder zu ersetzen. Weiter werden eigene Stärken und Fähigkeiten benutzt, um diesen Veränderungsprozess zu unterstützen.

### Was ist der Nutzen?

Mit Ihrer Teilnahme leisten Sie einen wichtigen Beitrag für die Wissenschaft und erlauben uns einerseits depressive Störungen und andererseits die Wirkungsweisen von psychotherapeutischen Behandlungen

besser zu verstehen, um weiterhin die Behandlungsmöglichkeiten stetig anpassen und verbessern zu können.

### **Wer kann an dieser Studie teilnehmen?**

Alle Personen über 18 Jahren können sich für die Studie anmelden. Gute Deutschkenntnisse werden vorausgesetzt. Nach der Durchführung eines Interviews und dem Ausfüllen der Fragebögen wird überprüft, ob alle Kriterien für den Einschluss in die Studie erfüllt sind. Dies wird mit Ihnen in einem Rückmeldegespräch besprochen und das weitere Vorgehen wird geplant. In diesem Gespräch werden Sie dann auch Rückmeldung über die Diagnostik bekommen.

### **Wie sieht der Ablauf der Studie aus?**

Nach dem ersten Anmeldungsgespräch in der Ambulanz und nach Ihrer Entscheidung, an der Studie teilnehmen zu wollen, werden Sie zufällig einer von drei Behandlungsbedingungen und einem/einer Therapeuten/Therapeutin zugeteilt. Danach folgen 7 Sitzungen, welche zur ausführlichen Diagnostik dienen (je nach Bedingung zweimal wöchentlich oder einmal wöchentlich). In diesen 7 Sitzungen wird der/die Therapeut/ Therapeutin mithilfe von Fragebögen und Interviews eine Diagnose nach den Kriterien der internationalen Diagnostiksysteme (ICD-10 und DSM-IV) stellen und einen Antrag an die Krankenkasse für die Kostenübernahme der Psychotherapie stellen.

Nach diesen 7 Sitzungen beginnt die Behandlung. Diese beträgt dann 24 Therapie-Sitzungen. Je nach Zufallszuteilung werden die Sitzungen zweimal pro Woche oder einmal pro Woche stattfinden. Damit wir die Erfolge der Therapie beurteilen können, werden Sie verschiedene Fragebögen zu verschiedenen Zeitpunkten ausfüllen. Diese Fragebögen beziehen sich vor allem auf Ihre aktuellen Belastungen, Ihre Stimmung, Ihre Erwartungen und Ihre subjektiven Beurteilung des Therapie-Erfolges und der Beziehung zum/zur Therapeuten/ Therapeutin. Die Messzeitpunkte, bei denen Sie diese Fragebögen ausfüllen, werden einmal am Anfang der Therapie, einmal in der 10. Therapiewoche, nach der 20., nach der 24. Therapiewoche und nach 3 Monaten nach dem Therapie-Ende, sowie nach 2 Jahren stattfinden.

### **Wie wird man der Art und Form der Behandlung zugeordnet?**

Die Therapieformen (KVT und KVT mit erwartungsfokussierten Interventionen (EFPI); Sitzungen 1 vs. 2 mal pro Woche) entsprechen dem neuesten Stand der Wissenschaft. Alle Behandlungen werden von speziell ausgebildeten Therapeutinnen und Therapeuten durchgeführt. Die Zuordnung zu einer Bedingung erfolgt per Zufall, d.h. jeder Teilnehmer/ jede Teilnehmerin wird per Zufallsentscheidung und nicht aufgrund bestimmter Eigenschaften einer der drei Therapieformen zugeordnet.

### **Was sind mögliche Nebenwirkungen, Belastungen und Risiken?**

Bislang gibt es aus der Forschung nur sehr wenige Belege für Nebenwirkungen in der Psychotherapie. In der geplanten Studie sind keine negativen Effekte auf Sie zu erwarten. Die Therapie an sich kann anstrengend und ermüdend sein und kann manchmal negative Gefühle auslösen. Um diese negativen Effekte kontinuierlich erfassen zu können, wird der Therapeut/ die Therapeutin Sie in jeder Stunde nach Ihrem aktuellen Befinden fragen, um mögliche negative Gefühle aufgreifen und bearbeiten zu können. Alle Therapeutinnen und Therapeuten stehen unter Supervision (Aufsicht) von ausgebildeten und sehr erfahrenen Psychotherapeutinnen. Falls die Behandlung nicht zum gewünschten Erfolg führt, können optionale Behandlungsmöglichkeiten mit der Psychotherapeutin/ dem Psychotherapeuten diskutiert werden.

### **Abbruch und Widerrufsrecht**

Die Teilnahme an der Studie ist freiwillig. Sie können jederzeit und ohne Angabe eines Grundes Ihre Einverständniserklärung zurückziehen und aus der Studie aussteigen. Der Rücktritt ist mit keinerlei Kosten oder Nachteilen verbunden. Es wird weiterhin die Möglichkeit geben, eine ambulante Therapie

an der Hochschulambulanz zu machen. Auf Wunsch können außerdem alle Daten, die im Rahmen der Studie erhoben wurden, gelöscht werden.

## Datenschutz

**Personenbezogene Daten während Therapie-Durchlauf:** Die Therapeutinnen und Therapeuten sind verpflichtet alle personenbezogenen Dokumentationen in einer Therapie-Akte in abschließbaren Schränken aufzubewahren. Für die Sicherstellung der Qualität der Behandlung sind u. U. Video-Aufnahmen von Therapiesitzungen notwendig, welche auf einer passwortgeschützten Festplatte in abgeschlossenen Schränken aufbewahrt werden. Diese Videos werden nach Abschluss der Studie und nach der Beurteilung der Therapie-Durchführung zur Qualitätssicherung während der Therapie gelöscht. Therapie-Akten werden nach Therapie-Ende gemäß den Aufbewahrungsfristen der DSGVO 10 Jahre aufbewahrt.

**Kodierliste:** Die Erhebung, Speicherung und Verarbeitung der persönlichen Daten (demographische Daten wie Alter und Geschlecht, Ergebnisse der Fragebögen und Interviews) erfolgen pseudonomisiert unter Verwendung eines Codes, ohne Angaben ihres Namens. Es existiert eine Kodierliste auf Papier (im Institut Psychologie, AG klinische Psychologie und Psychotherapie Philipps-Universität Marburg), welche Ihren Namen mit Ihrem zugeordneten Code verbindet. Diese Liste ist nur den Versuchsleiter/innen (Studientherapeutinnen und Studientherapeuten) und dem Projektleiter zugänglich. Diese Liste wird in einem verschließbaren Schrank aufbewahrt und nach Abschluss der Studie vernichtet. Ihre Daten sind ab dem Zeitpunkt komplett anonymisiert. Es ist dann nicht mehr möglich, den Code Ihrem Namen zuzuordnen. Solange diese Liste existiert, können Sie jederzeit die Löschung Ihrer Daten beantragen. Ab der Löschung der Liste ist dies nicht mehr möglich.

**Studien- und Datenqualität:** Zur Qualitätssicherung der Durchführung der Studie werden Studien-unabhängige Prüferinnen und Prüfer, vorausgesetzt Ihrer schriftlichen Einverständniserklärung zur Schweigepflichtsentbindung, Einblick in personenbezogene Daten (v.a. Therapie-Sitzungen) nehmen, um die Durchführung der Therapie zu überprüfen. Weiterhin können mit Ihrer Unterschrift zur Schweigepflichtsentbindung Supervisorinnen und Supervisoren Einblick in personenbezogene Daten nehmen (Videos, Akten), um die Studientherapeutinnen und Studientherapeuten bestmöglichst bei der Therapie-Durchführung zu unterstützen.

Diese Befragung wird mit Hilfe des Portals <https://www.soscisurvey.de> durchgeführt. Hierbei werden folgende zentrale Sicherheitsaspekte berücksichtigt: keine Speicherung der IP-Adressen in den Logfiles, es findet eine SSL-Verschlüsselung statt und der Server befindet sich in München, Deutschland. Die detaillierten Hinweise zum Datenschutz können unter folgendem Link nachgelesen werden: <https://www.soscisurvey.de/index.php?page=privacy>.

## Ansprechpartner

Diese Studie wird unter Leitung von Herrn Prof. Dr. Winfried Rief, Arbeitsgruppe Klinische Psychologie und Psychotherapie, Fachbereich Psychologie der Philipps-Universität Marburg, Gutenbergstraße 18, 35037 Marburg durchgeführt.

Ansprechpartner für die Studie sind:

- Frau M. Sc. Anne-Catherine Ewen (Telefon: 06421 28 24053, E-Mail: [ewen@staff.uni-marburg.de](mailto:ewen@staff.uni-marburg.de))

- Herr Dr. Marcel Wilhelm (Telefon: 06421 28 23617, E-Mail: [marcel.wilhelm@staff.uni-marburg.de](mailto:marcel.wilhelm@staff.uni-marburg.de))
- Frau Dr. Pia von Blanckenburg (Telefon: 06421 28 2405, E-Mail: [blanckep@staff.uni-marburg.de](mailto:blanckep@staff.uni-marburg.de))
- Frau Dr. Gaby Bleichhardt (Telefon: 06421 28 2369, E-Mail: [gaby.bleichhardt@staff.uni-marburg.de](mailto:gaby.bleichhardt@staff.uni-marburg.de))
- Frau Dr. Katrin Wambach (Telefon: 06421 28 23681, E-Mail: [wambach@staff.uni-marburg.de](mailto:wambach@staff.uni-marburg.de)) Der verantwortliche Studienleiter,  
Herr Prof. Dr. Winfried Rief (Telefon: 06421 28 23641, E-Mail: [riefw@staff.uni-marburg.de](mailto:riefw@staff.uni-marburg.de)),  
kann ebenfalls bei weiteren Fragen kontaktiert werden.

Wenn Sie alle Informationen gelesen und verstanden haben, die Gelegenheit für Rückfragen hatten und diese angemessen beantwortet wurden, bitten wir Sie Ihre Teilnahme an der Studie mit der Unterschrift auf der beiliegenden Einverständniserklärung zu bestätigen.

Herzlichen Dank!

### **Ihr EFFECT-Studien-Team**

**E-Mail:** [effect04@uni-marburg.de](mailto:effect04@uni-marburg.de) **Tel:**06421-22834

## **Einverständniserklärung zur Studienteilnahme**

Mir wurde von Frau/ Herrn \_\_\_\_\_ ausführlich erklärt, worum es in der EFFECT-Studie geht.

Ich, \_\_\_\_\_ (Name der Teilnehmerin / des Teilnehmers), habe ein Informationsblatt mit näheren Informationen zum Ziel und Ablauf der oben genannten Studie erhalten („Studieninformation“). Ich habe alle Informationen vollständig gelesen und verstanden. Sofern ich Fragen zu der Studie hatte, wurden sie vollständig und zu meiner Zufriedenheit beantwortet.

Ich erkläre mich mit den im Informationsblatt („Studieninformation für Teilnehmerinnen und Teilnehmer“) beschriebenen Erklärungen und Studienbedingungen und mit der beschriebenen Handhabung der erhobenen Daten einverstanden. Ich wurde darüber informiert, dass meine Teilnahme freiwillig ist. Ich weiß, dass ich jederzeit und ohne Angabe von Gründen meine Zustimmung zur Teilnahme widerrufen kann, ohne dass mir dadurch irgendwelche Nachteile entstehen. Wenn die Notwendigkeit besteht, kann ich weiter an einer ambulanten Psychotherapie an der Psychotherapie-Ambulanz Marburg/ Institut für Psychotherapie-Ausbildung Marburg (PAM/ IPAM) teilnehmen. Mir ist bekannt, wie und von wem meine persönlichen Daten im Rahmen der Studie verarbeitet werden. Wenn ich das möchte, weiß ich, dass ich die Löschung meiner Daten einfordern kann.

Eine Ausfertigung der Teilnehmerinformationen und Einwilligungserklärung habe ich erhalten. Ich hatte genügend Zeit eine Entscheidung zu treffen und erkläre mich hiermit bereit, an der oben genannten Studie teilzunehmen.

\_\_\_\_\_ Name des Teilnehmers/ der Teilnehmerin

\_\_\_\_\_ Name des Diagnostikers/ der Diagnostikerin

\_\_\_\_\_ Ort, Datum und Unterschrift des Teilnehmers/ der Teilnehmerin

\_\_\_\_\_ Ort, Datum und Unterschrift des Diagnostikers/ der Diagnostikerin

**A 2. Content examples of the CBT- versus the EFPI-manual.**

| <b>CBT-modules</b>                                                                                                                                                           |                           |                                                                                                                                                                                                      |
|------------------------------------------------------------------------------------------------------------------------------------------------------------------------------|---------------------------|------------------------------------------------------------------------------------------------------------------------------------------------------------------------------------------------------|
| Psychoeducation depression                                                                                                                                                   | First session             | Introduction of cognitive-behavioral therapy explanatory models and development of an individual disorder model                                                                                      |
| Depending on the main problems, selection of modules for six therapy sessions                                                                                                | Daily problems            | Promote problem solving skills, work on current problems                                                                                                                                             |
|                                                                                                                                                                              | Emotion regulation        | Functionality of emotions, emotions and needs, mindfulness/ acceptance for emotions, emotion analysis                                                                                                |
|                                                                                                                                                                              | Relaxation                | Psychoeducation stress vs. relaxation, Progressive muscle relaxation                                                                                                                                 |
|                                                                                                                                                                              | Inactivity                | Depression spiral, week protocols, positive activities                                                                                                                                               |
|                                                                                                                                                                              | Self-esteem               | Am-me, should-me, wish-me, dysfunctional self-devaluation, sources of self-esteem                                                                                                                    |
|                                                                                                                                                                              | Social competences        | Elaborating interpersonal problems, role plays                                                                                                                                                       |
|                                                                                                                                                                              | Cognitions                | Cognitive triad, ABC(DE)-scheme, work on dysfunctional thoughts                                                                                                                                      |
| Individual buffer                                                                                                                                                            | Four sessions             | Depending on the needs of the client                                                                                                                                                                 |
| End                                                                                                                                                                          | 24 <sup>th</sup> session  | relapse prevention and conclusion                                                                                                                                                                    |
| <b>EFPI-modules</b>                                                                                                                                                          |                           |                                                                                                                                                                                                      |
| Psychoeducation of depression in consideration of expectation processes                                                                                                      | Five therapy sessions     | Introduction to „unhelpful (dysfunctional)“ expectations integrated in cognitive-behavioral explanation models, expectation persistence mechanisms based on the ViolEx-model, behavioral experiments |
| Flexible application of different topics with the aim of planning one behavioral experiment per therapy session to test own expectations (examples based on the CBT modules) | Social competences        | e.g., as part of a behavioral experiment, try out a new social skill at home and evaluate it                                                                                                         |
|                                                                                                                                                                              | Relaxation                | e.g., In the context of a behavioral experiment, taking time for oneself, PMR, mindfulness practice and evaluate it                                                                                  |
|                                                                                                                                                                              | Inactivity                | e.g., In the context of a behavioral experiment, trying a new activity and evaluate it                                                                                                               |
|                                                                                                                                                                              | Self-esteem               | e.g., In the context of a behavioral experiment, try changed expectations to oneself, formulating positive things about oneself and evaluate it                                                      |
|                                                                                                                                                                              | Emotion regulation        | e.g., In the context of a behavioral experiment, trying a certain emotion regulation strategy and evaluate it                                                                                        |
|                                                                                                                                                                              | Daily problems            | e.g., In the context of a behavioral experiment, test certain solutions and evaluate it                                                                                                              |
|                                                                                                                                                                              | Cognitions (expectations) | e.g., In the context of a behavioral experiment, try other thoughts/ expectations and evaluate it                                                                                                    |
| End                                                                                                                                                                          | Last session              | relapse prevention and conclusion                                                                                                                                                                    |
